# Supplementary material for: Time Series Analysis of Sexual Assault Case Characteristics and the 2007–2008 Period of Post-Election Violence in Kenya
Source: PubMed Central journal article supplement (PMC4149572; doi:10.1371/journal.pone.0106443), 2014-08-29
Supplement: pone.0106443.s001.pdf [file pone.0106443.s001.pdf]

**Table S1. Time series data for sexual assault case characteristics, 2007-2011**

| A  | B | C | D     | E     | F     | G     | H     | I     | J     | K     | L     | M     | N     | O     | P     | Q     | R     | S     | T     | U     | V     |
|----|---|---|-------|-------|-------|-------|-------|-------|-------|-------|-------|-------|-------|-------|-------|-------|-------|-------|-------|-------|-------|
| 1  | 0 | 0 | 0.182 | 0.050 | 0.000 | 0.955 | 0.000 | 0.000 | 0.000 | 0.364 | 0.091 | 0.000 | 0.000 | 0.045 | 0.000 | 0.000 | 0.227 | 0.045 | 0.000 | 0.091 | 0.000 |
| 2  | 0 | 0 | 0.286 | 0.214 | 0.000 | 0.714 | 0.143 | 0.143 | 0.000 | 0.429 | 0.071 | 0.071 | 0.000 | 0.000 | 0.000 | 0.071 | 0.571 | 0.071 | 0.000 | 0.571 | 0.143 |
| 3  | 0 | 0 | 0.100 | 0.100 | 0.000 | 1.000 | 0.100 | 0.100 | 0.000 | 0.400 | 0.100 | 0.000 | 0.000 | 0.000 | 0.000 | 0.300 | 0.600 | 0.100 | 0.000 | 0.100 | 0.000 |
| 4  | 0 | 0 | 0.167 | 0.250 | 0.000 | 1.000 | 0.000 | 0.250 | 0.000 | 0.417 | 0.083 | 0.000 | 0.000 | 0.083 | 0.000 | 0.000 | 0.333 | 0.083 | 0.000 | 0.250 | 0.000 |
| 5  | 0 | 0 | 0.125 | 0.063 | 0.000 | 0.813 | 0.063 | 0.188 | 0.063 | 0.688 | 0.063 | 0.000 | 0.000 | 0.063 | 0.000 | 0.500 | 0.813 | 0.125 | 0.063 | 0.000 | 0.063 |
| 6  | 0 | 0 | 0.156 | 0.065 | 0.000 | 0.813 | 0.000 | 0.031 | 0.031 | 0.406 | 0.094 | 0.000 | 0.000 | 0.031 | 0.031 | 0.094 | 0.469 | 0.063 | 0.125 | 0.097 | 0.000 |
| 7  | 0 | 0 | 0.333 | 0.190 | 0.000 | 0.867 | 0.067 | 0.067 | 0.000 | 0.533 | 0.067 | 0.000 | 0.000 | 0.000 | 0.000 | 0.244 | 0.556 | 0.044 | 0.022 | 0.022 | 0.044 |
| 8  | 0 | 0 | 0.125 | 0.105 | 0.000 | 0.675 | 0.050 | 0.125 | 0.000 | 0.500 | 0.050 | 0.025 | 0.000 | 0.025 | 0.025 | 0.125 | 0.625 | 0.075 | 0.050 | 0.026 | 0.050 |
| 9  | 0 | 1 | 0.263 | 0.086 | 0.000 | 0.763 | 0.079 | 0.211 | 0.053 | 0.500 | 0.026 | 0.000 | 0.079 | 0.000 | 0.000 | 0.132 | 0.632 | 0.105 | 0.026 | 0.056 | 0.079 |
| 10 | 0 | 1 | 0.192 | 0.080 | 0.000 | 1.000 | 0.000 | 0.154 | 0.077 | 0.423 | 0.000 | 0.000 | 0.038 | 0.000 | 0.000 | 0.346 | 0.462 | 0.115 | 0.115 | 0.038 | 0.000 |
| 11 | 0 | 1 | 0.238 | 0.048 | 0.000 | 0.905 | 0.048 | 0.190 | 0.095 | 0.571 | 0.048 | 0.000 | 0.048 | 0.048 | 0.000 | 0.429 | 0.857 | 0.095 | 0.048 | 0.050 | 0.048 |
| 12 | 1 | 0 | 0.419 | 0.286 | 0.023 | 0.814 | 0.140 | 0.070 | 0.047 | 0.628 | 0.023 | 0.023 | 0.047 | 0.047 | 0.000 | 0.233 | 0.605 | 0.047 | 0.047 | 0.372 | 0.070 |
| 13 | 1 | 0 | 0.629 | 0.412 | 0.000 | 0.886 | 0.086 | 0.114 | 0.057 | 0.314 | 0.000 | 0.000 | 0.000 | 0.114 | 0.000 | 0.486 | 0.657 | 0.029 | 0.057 | 0.286 | 0.086 |
| 14 | 1 | 0 | 0.294 | 0.353 | 0.000 | 0.882 | 0.118 | 0.235 | 0.000 | 0.706 | 0.118 | 0.000 | 0.000 | 0.059 | 0.059 | 0.412 | 0.647 | 0.118 | 0.059 | 0.176 | 0.118 |
| 15 | 0 | 0 | 0.207 | 0.069 | 0.000 | 0.828 | 0.103 | 0.103 | 0.000 | 0.690 | 0.103 | 0.000 | 0.034 | 0.034 | 0.069 | 0.483 | 0.517 | 0.034 | 0.103 | 0.207 | 0.103 |
| 16 | 0 | 0 | 0.320 | 0.200 | 0.000 | 0.920 | 0.080 | 0.120 | 0.080 | 0.520 | 0.040 | 0.000 | 0.080 | 0.120 | 0.080 | 0.440 | 0.760 | 0.160 | 0.200 | 0.120 | 0.040 |
| 17 | 0 | 0 | 0.333 | 0.304 | 0.000 | 0.958 | 0.042 | 0.167 | 0.083 | 0.500 | 0.083 | 0.000 | 0.000 | 0.000 | 0.000 | 0.417 | 0.708 | 0.042 | 0.083 | 0.043 | 0.042 |
| 18 | 0 | 0 | 0.241 | 0.103 | 0.000 | 0.862 | 0.034 | 0.103 | 0.069 | 0.690 | 0.138 | 0.000 | 0.034 | 0.069 | 0.000 | 0.552 | 0.621 | 0.103 | 0.103 | 0.034 | 0.069 |
| 19 | 0 | 0 | 0.321 | 0.179 | 0.036 | 0.750 | 0.250 | 0.071 | 0.036 | 0.607 | 0.107 | 0.000 | 0.036 | 0.000 | 0.000 | 0.607 | 0.750 | 0.107 | 0.107 | 0.143 | 0.214 |
| 20 | 0 | 0 | 0.238 | 0.250 | 0.024 | 0.929 | 0.024 | 0.095 | 0.071 | 0.595 | 0.095 | 0.024 | 0.095 | 0.048 | 0.048 | 0.476 | 0.786 | 0.095 | 0.071 | 0.071 | 0.024 |
| 21 | 0 | 0 | 0.326 | 0.214 | 0.023 | 0.907 | 0.093 | 0.140 | 0.093 | 0.651 | 0.093 | 0.023 | 0.023 | 0.023 | 0.023 | 0.256 | 0.791 | 0.070 | 0.023 | 0.023 | 0.093 |
| 22 | 0 | 0 | 0.444 | 0.212 | 0.000 | 0.889 | 0.111 | 0.194 | 0.083 | 0.639 | 0.000 | 0.056 | 0.083 | 0.028 | 0.028 | 0.194 | 0.750 | 0.167 | 0.111 | 0.000 | 0.083 |
| 23 | 0 | 0 | 0.295 | 0.000 | 0.000 | 0.886 | 0.023 | 0.023 | 0.000 | 0.682 | 0.045 | 0.023 | 0.000 | 0.000 | 0.045 | 0.227 | 0.727 | 0.091 | 0.091 | 0.068 | 0.023 |
| 24 | 0 | 0 | 0.245 | 0.070 | 0.000 | 0.939 | 0.041 | 0.000 | 0.082 | 0.531 | 0.061 | 0.020 | 0.020 | 0.041 | 0.000 | 0.469 | 0.714 | 0.082 | 0.204 | 0.041 | 0.020 |
| 25 | 0 | 0 | 0.278 | 0.118 | 0.000 | 0.833 | 0.167 | 0.111 | 0.111 | 0.722 | 0.167 | 0.000 | 0.000 | 0.000 | 0.056 | 0.222 | 0.667 | 0.167 | 0.000 | 0.111 | 0.056 |
| 26 | 0 | 0 | 0.259 | 0.125 | 0.000 | 0.852 | 0.111 | 0.111 | 0.074 | 0.370 | 0.037 | 0.037 | 0.037 | 0.037 | 0.074 | 0.222 | 0.556 | 0.222 | 0.037 | 0.074 | 0.111 |
| 27 | 0 | 0 | 0.310 | 0.200 | 0.000 | 0.857 | 0.000 | 0.119 | 0.048 | 0.524 | 0.071 | 0.000 | 0.071 | 0.048 | 0.024 | 0.190 | 0.619 | 0.119 | 0.214 | 0.048 | 0.048 |
| 28 | 0 | 0 | 0.400 | 0.200 | 0.000 | 1.000 | 0.000 | 0.100 | 0.000 | 0.400 | 0.000 | 0.000 | 0.000 | 0.000 | 0.050 | 0.200 | 0.450 | 0.050 | 0.150 | 0.050 | 0.000 |
| 29 | 0 | 0 | 0.500 | 0.333 | 0.000 | 0.833 | 0.167 | 0.333 | 0.167 | 0.333 | 0.000 | 0.000 | 0.000 | 0.000 | 0.167 | 0.167 | 0.500 | 0.167 | 0.167 | 0.167 | 0.167 |
| 30 | 0 | 0 | 0.000 | 0.091 | 0.000 | 0.909 | 0.091 | 0.000 | 0.182 | 0.455 | 0.182 | 0.000 | 0.000 | 0.091 | 0.000 | 0.091 | 0.455 | 0.000 | 0.000 | 0.273 | 0.091 |
| 31 | 0 | 0 | 0.188 | 0.188 | 0.000 | 0.875 | 0.125 | 0.063 | 0.000 | 0.500 | 0.125 | 0.000 | 0.000 | 0.000 | 0.063 | 0.188 | 0.750 | 0.188 | 0.063 | 0.125 | 0.188 |

| A  | B | C | D     | E     | F     | G     | H     | I     | J     | K     | L     | M     | N     | O     | P     | Q     | R     | S     | T     | U     | V     |
|----|---|---|-------|-------|-------|-------|-------|-------|-------|-------|-------|-------|-------|-------|-------|-------|-------|-------|-------|-------|-------|
| 32 | 0 | 0 | 0.190 | 0.050 | 0.000 | 0.857 | 0.000 | 0.000 | 0.048 | 0.571 | 0.048 | 0.000 | 0.048 | 0.000 | 0.000 | 0.095 | 0.524 | 0.048 | 0.000 | 0.000 | 0.143 |
| 33 | 0 | 0 | 0.280 | 0.160 | 0.000 | 0.960 | 0.000 | 0.120 | 0.040 | 0.720 | 0.160 | 0.000 | 0.040 | 0.000 | 0.000 | 0.480 | 0.800 | 0.040 | 0.040 | 0.160 | 0.000 |
| 34 | 0 | 0 | 0.167 | 0.143 | 0.028 | 0.889 | 0.083 | 0.028 | 0.111 | 0.639 | 0.194 | 0.056 | 0.000 | 0.028 | 0.028 | 0.528 | 0.833 | 0.111 | 0.139 | 0.056 | 0.111 |
| 35 | 0 | 0 | 0.244 | 0.125 | 0.000 | 0.951 | 0.049 | 0.098 | 0.073 | 0.610 | 0.098 | 0.049 | 0.049 | 0.049 | 0.049 | 0.610 | 0.878 | 0.122 | 0.073 | 0.049 | 0.049 |
| 36 | 0 | 0 | 0.320 | 0.200 | 0.000 | 0.960 | 0.040 | 0.120 | 0.040 | 0.520 | 0.080 | 0.080 | 0.000 | 0.040 | 0.000 | 0.520 | 0.960 | 0.080 | 0.040 | 0.125 | 0.040 |
| 37 | 0 | 0 | 0.200 | 0.000 | 0.000 | 0.960 | 0.040 | 0.040 | 0.000 | 0.600 | 0.120 | 0.000 | 0.000 | 0.000 | 0.000 | 0.080 | 0.840 | 0.000 | 0.000 | 0.080 | 0.080 |
| 38 | 0 | 0 | 0.222 | 0.059 | 0.000 | 0.944 | 0.056 | 0.056 | 0.111 | 0.833 | 0.056 | 0.000 | 0.000 | 0.056 | 0.056 | 0.111 | 0.889 | 0.000 | 0.000 | 0.111 | 0.056 |
| 39 | 0 | 0 | 0.265 | 0.030 | 0.000 | 0.941 | 0.059 | 0.059 | 0.088 | 0.706 | 0.118 | 0.029 | 0.000 | 0.088 | 0.000 | 0.206 | 0.824 | 0.029 | 0.088 | 0.088 | 0.029 |
| 40 | 0 | 0 | 0.045 | 0.190 | 0.000 | 1.000 | 0.000 | 0.045 | 0.000 | 0.682 | 0.000 | 0.000 | 0.045 | 0.000 | 0.000 | 0.136 | 0.773 | 0.045 | 0.091 | 0.091 | 0.000 |
| 41 | 0 | 0 | 0.294 | 0.133 | 0.000 | 0.824 | 0.176 | 0.294 | 0.000 | 0.882 | 0.118 | 0.000 | 0.000 | 0.118 | 0.000 | 0.176 | 0.941 | 0.059 | 0.059 | 0.176 | 0.176 |
| 42 | 0 | 0 | 0.286 | 0.111 | 0.000 | 0.893 | 0.107 | 0.250 | 0.107 | 0.714 | 0.143 | 0.071 | 0.036 | 0.107 | 0.000 | 0.107 | 0.857 | 0.179 | 0.036 | 0.036 | 0.071 |
| 43 | 0 | 0 | 0.250 | 0.094 | 0.000 | 0.906 | 0.031 | 0.063 | 0.094 | 0.875 | 0.094 | 0.000 | 0.000 | 0.031 | 0.000 | 0.188 | 0.750 | 0.094 | 0.000 | 0.031 | 0.063 |
| 44 | 0 | 0 | 0.150 | 0.000 | 0.000 | 0.800 | 0.250 | 0.000 | 0.100 | 0.800 | 0.000 | 0.000 | 0.050 | 0.000 | 0.050 | 0.200 | 0.700 | 0.050 | 0.000 | 0.150 | 0.150 |
| 45 | 0 | 0 | 0.214 | 0.037 | 0.000 | 0.893 | 0.036 | 0.000 | 0.036 | 0.607 | 0.107 | 0.000 | 0.036 | 0.000 | 0.036 | 0.214 | 0.821 | 0.036 | 0.071 | 0.107 | 0.000 |
| 46 | 0 | 0 | 0.100 | 0.080 | 0.020 | 0.800 | 0.040 | 0.060 | 0.100 | 0.640 | 0.100 | 0.120 | 0.020 | 0.020 | 0.040 | 0.460 | 0.880 | 0.100 | 0.160 | 0.020 | 0.060 |
| 47 | 0 | 0 | 0.186 | 0.119 | 0.000 | 0.930 | 0.047 | 0.000 | 0.047 | 0.767 | 0.093 | 0.023 | 0.023 | 0.023 | 0.023 | 0.209 | 0.791 | 0.070 | 0.070 | 0.023 | 0.070 |
| 48 | 0 | 0 | 0.167 | 0.111 | 0.000 | 0.889 | 0.167 | 0.000 | 0.000 | 0.667 | 0.056 | 0.000 | 0.000 | 0.056 | 0.056 | 0.167 | 0.722 | 0.167 | 0.111 | 0.111 | 0.111 |
| 49 | 0 | 0 | 0.333 | 0.222 | 0.000 | 1.000 | 0.000 | 0.056 | 0.000 | 0.778 | 0.056 | 0.000 | 0.000 | 0.056 | 0.000 | 0.167 | 0.889 | 0.056 | 0.056 | 0.222 | 0.000 |
| 50 | 0 | 0 | 0.182 | 0.273 | 0.000 | 0.727 | 0.182 | 0.182 | 0.000 | 0.818 | 0.000 | 0.000 | 0.000 | 0.000 | 0.000 | 0.182 | 0.636 | 0.000 | 0.091 | 0.182 | 0.182 |
| 51 | 0 | 0 | 0.429 | 0.143 | 0.000 | 1.000 | 0.000 | 0.286 | 0.000 | 0.571 | 0.071 | 0.071 | 0.071 | 0.071 | 0.071 | 0.143 | 0.786 | 0.286 | 0.286 | 0.143 | 0.000 |
| 52 | 0 | 0 | 0.118 | 0.125 | 0.059 | 0.882 | 0.118 | 0.059 | 0.118 | 0.588 | 0.000 | 0.000 | 0.000 | 0.000 | 0.000 | 0.118 | 0.706 | 0.059 | 0.059 | 0.118 | 0.059 |
| 53 | 0 | 0 | 0.182 | 0.091 | 0.091 | 0.909 | 0.091 | 0.000 | 0.000 | 0.818 | 0.091 | 0.000 | 0.000 | 0.000 | 0.000 | 0.091 | 0.636 | 0.000 | 0.000 | 0.000 | 0.091 |
| 54 | 0 | 0 | 0.136 | 0.095 | 0.000 | 0.636 | 0.409 | 0.091 | 0.045 | 0.727 | 0.045 | 0.045 | 0.000 | 0.000 | 0.000 | 0.182 | 0.682 | 0.045 | 0.045 | 0.318 | 0.318 |
| 55 | 0 | 0 | 0.000 | 0.000 | 0.000 | 0.938 | 0.063 | 0.000 | 0.000 | 0.563 | 0.188 | 0.000 | 0.000 | 0.000 | 0.000 | 0.063 | 0.813 | 0.000 | 0.000 | 0.125 | 0.063 |
| 56 | 0 | 0 | 0.056 | 0.056 | 0.000 | 0.889 | 0.056 | 0.000 | 0.111 | 0.722 | 0.111 | 0.000 | 0.000 | 0.000 | 0.000 | 0.111 | 0.889 | 0.111 | 0.167 | 0.056 | 0.056 |
| 57 | 0 | 0 | 0.355 | 0.129 | 0.000 | 0.935 | 0.065 | 0.258 | 0.000 | 0.645 | 0.129 | 0.000 | 0.065 | 0.097 | 0.000 | 0.161 | 0.710 | 0.032 | 0.097 | 0.000 | 0.065 |
| 58 | 0 | 0 | 0.208 | 0.064 | 0.000 | 0.917 | 0.104 | 0.146 | 0.083 | 0.625 | 0.083 | 0.000 | 0.000 | 0.021 | 0.042 | 0.146 | 0.792 | 0.083 | 0.000 | 0.022 | 0.083 |
| 59 | 0 | 0 | 0.200 | 0.158 | 0.025 | 0.925 | 0.025 | 0.075 | 0.075 | 0.600 | 0.125 | 0.050 | 0.075 | 0.075 | 0.075 | 0.375 | 0.800 | 0.125 | 0.250 | 0.025 | 0.050 |
| 60 | 0 | 0 | 0.231 | 0.269 | 0.000 | 0.808 | 0.115 | 0.038 | 0.115 | 0.731 | 0.154 | 0.000 | 0.000 | 0.000 | 0.000 | 0.462 | 0.731 | 0.000 | 0.077 | 0.000 | 0.115 |

**Figure S1. Variables for Table S1**

| Field | Description                                                                         |
|-------|-------------------------------------------------------------------------------------|
| A     | Month                                                                               |
| B     | Month of post-election violence                                                     |
| C     | Sensitivity measure for dummy analysis                                              |
| D     | Survivor did not know perpetrator                                                   |
| E     | More than one perpetrator                                                           |
| F     | Oral assault                                                                        |
| G     | Vaginal assault                                                                     |
| H     | Anal assault                                                                        |
| I     | Weapon used                                                                         |
| J     | Condom used                                                                         |
| K     | Rape was witnessed                                                                  |
| L     | History of previous rape                                                            |
| M     | Chest injury                                                                        |
| N     | Back injury                                                                         |
| O     | Abdominal injury                                                                    |
| P     | Skin injury                                                                         |
| Q     | Emotional distress                                                                  |
| R     | Anogenital injury                                                                   |
| S     | Head/neck injury                                                                    |
| T     | Limbs injury                                                                        |
| U     | > month lag between date of assault and date of presentation to healthcare facility |
| V     | Male                                                                                |
